# Supplementary material
Source: PubMed Central journal article supplement (PMC11112621)
Supplement: NIHMS1986726-supplement-Visual_Abstract.pdf [file NIHMS1986726-supplement-Visual_Abstract.pdf]

# Postoperative Outcomes After Staged vs. Coordinated Breast Surgery and Bilateral Salpingo-oophorectomy

Benefits of coordinating breast and gynecologic operations in candidates for risk-reducing surgery:

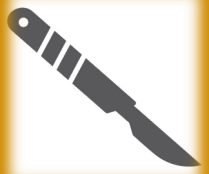

Fewer Surgeries

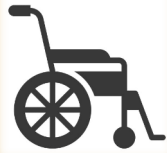

Consolidated Recovery

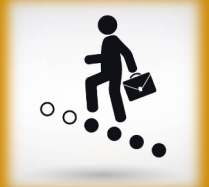

Less Time Off Work

Are coordinated breast and gynecologic operations safe and cost effective?

Patients in the MarketScan® claims database who underwent both BSO and breast surgery from 2010-2015 (N=4228)

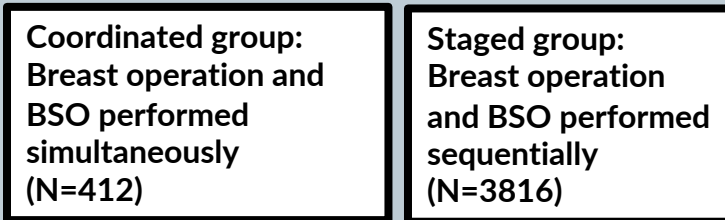

Primary Endpoints:

1. 90-day postoperative complications
2. 2-year postoperative total healthcare charges

Coordinated mastectomy and BSO was associated with:

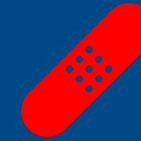

Higher rates of postoperative complications

Coordinated lumpectomy and BSO was associated with:

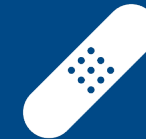

Similar rates of postoperative complications

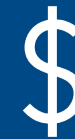

Costs were similar for staged vs coordinated operations

Vemuru et al. *Ann Surg Oncol*.

Visual Abstract by @sudheervemuru and @sarahtevismd for @AnnSurgOncol

ANNALS OF  
**SURGICAL  
ONCOLOGY**
